# Supplementary material for: Influence of Cellulose on the Anoxic Treatment of Domestic Wastewater in Septic Tanks: Statistical Analysis of the Chemical and Physico-Chemical Parameters
Source: MDPI journal article supplement (doi:10.3390/su15107990), 2023-05-13
Supplement: s1 [file s1]

# Influence of Cellulose on Anoxic Treatment of Domestic Wastewater in Septic Tank: Statistical Analysis of The Chemical and Physico-Chemical Parameters

Denisa Djordjevićová <sup>1</sup>, Marco Carnevale Miino <sup>1,\*</sup>, Jakub Raček <sup>1</sup>, Petr Hlavínek <sup>1</sup>, Tomáš Chorazy <sup>1</sup>, Vladana Rajković-Ognjanović <sup>2</sup>, Nada Cvijetić <sup>2</sup>

<sup>1</sup> AdMaS Research Centre, Faculty of Civil Engineering, Brno University of Technology, Purkyňova 651/139, 612 00 Brno, Czech Republic; denisa.djordjevicova@vutbr.cz (D.D.), racek.j@fce.vutbr.cz (J.R.); hlavinek.p@fce.vutbr.cz (P.H.), chorazy.t@fce.vutbr.cz (T.C.)

<sup>2</sup> Laboratory for Water Quality, Belgrade Faculty of Civil Engineering, Bulevar kralja Aleksandra 73, Belgrade 11000, Serbia; vladana@grf.bg.ac.rs (V.R-O.), ncvijectic@grf.bg.ac.rs (N.C.)

\* Correspondence: marco.carnevale.miino@vut.cz

## SUPPLEMENTARY MATERIALS:

**Equation S1.** Equation of Van't Hoff–Arrhenius [34].

$$K_T = K_{20} \Theta^{(T-20)}$$

$K_T$ : coefficient of reaction rate at  $T$ ;

$K_{20}$ : coefficient of reaction rate at 20 °C;

$\Theta$ : coefficient of temperature activity;

$T$ : temperature.

**Table S1.** Average water consumption for domestic use. Data elaborated from [24].

| Domestic use                                                                                                         | Average daily consumption (%) |
|----------------------------------------------------------------------------------------------------------------------|-------------------------------|
| WC (4 L water flusher according to EN 14055+A1 91 4640 is needed for 6 times flash + 0.4 kg of faeces + 1.6 L urine) | 24                            |
| Personal hygiene, showering                                                                                          | 39                            |
| Laundry, cleaning                                                                                                    | 17                            |
| Food preparation, washing dishes                                                                                     | 9                             |
| Hand washing                                                                                                         | 6                             |
| Drink                                                                                                                | 2                             |
| Other                                                                                                                | 5                             |

**Table S2.** List of drugs in the wastewater samples and their mass fractions. \*: These values referred to the dosage in each 20 L of WW.

| Pharmaceutical product                                  | Type          | Components and dosages *                                                                                                                                                |
|---------------------------------------------------------|---------------|-------------------------------------------------------------------------------------------------------------------------------------------------------------------------|
| Yaz (Bayer HealthCare Pharmaceuticals, Berlin, Germany) | Contraceptive | 27.3 µg L <sup>-1</sup> of drospirenone and 0.2 µg L <sup>-1</sup> of ethinyl estradiol                                                                                 |
| Probiotik                                               | Probiotic     | 4.5 µg L <sup>-1</sup> of lyophilized live probiotic bacteria: Lactobacillus acidophilus Rosell-52, Lactobacillus rhamnosus Rosell-11, Bifidobacterium longum Rosell-17 |

|                                                                    |                   |                                                                                                                                                                                                                                                                                                                                                                                                    |
|--------------------------------------------------------------------|-------------------|----------------------------------------------------------------------------------------------------------------------------------------------------------------------------------------------------------------------------------------------------------------------------------------------------------------------------------------------------------------------------------------------------|
| Doksicilin (Mylan N.V., Canonsburg, Pennsylvania, United States)   | Antibiotic        | 2.27 mg L <sup>-1</sup> of doksiciklin-hiklata against the following strains of bacteria: Streptococcus pneumoniae, Haemophilus influenzae, Klebsiella pneumoniae, Moraxella catarrhalis, Mycoplasma pneumoniae, Klebsiella species, Enterobacter species, Escherichia coli, Streptococcus faecalis, Chlamydia trachomatis, Ureaplasma urealyticum (T-mycoplasma), Calymmatobacterium granulomatis |
| Ibuprofen (BASF Corporation, New Jersey, U.S.A.)                   | Analgesic         | 9.09 mg L <sup>-1</sup> of ibuprofen                                                                                                                                                                                                                                                                                                                                                               |
| Propranolol (Bristol Laboratories Ltd, Berkhamsted, UK)            | Beta blocker      | 454.5 µg L <sup>-1</sup> of propranolol-hydrochloride                                                                                                                                                                                                                                                                                                                                              |
| Aspirin (Bayer HealthCare Pharmaceuticals, Berlin, Germany)        | Antipyretic       | 4.5 mg L <sup>-1</sup> of acetylsalicylic acid                                                                                                                                                                                                                                                                                                                                                     |
| Pantoprazole (Abbott Laboratories, Chicago, Illinois, Stati Uniti) | Gastric protector | 454.5 µg L <sup>-1</sup> of pantoprazole in the form of Pantoprazole sodium, sesquihydrate                                                                                                                                                                                                                                                                                                         |
| Amoksiklav (Lek d. d., Ljubljana, Slovenia)                        | Antibiotic        | 11.36 mg L <sup>-1</sup> of amoxicillin in the form of Amoxicillin trihydrate and 2.84 mg L <sup>-1</sup> of clavulanic acid in the form of potassium clavulanate                                                                                                                                                                                                                                  |

**Table S3.** Mean and confidence interval (C.I.) of parameters monitored during the three months of tests of the pilot plants.

| Parameter                               | CWW    |        | NCWW   |        |
|-----------------------------------------|--------|--------|--------|--------|
|                                         | Mean   | C.I.   | Mean   | C.I.   |
| T [° C]                                 | 21.8   | 0.5    | 21.4   | 0.5    |
| EC [µS cm <sup>-1</sup> ]               | 2710.7 | 78.8   | 2352.1 | 64     |
| TUR [NTU]                               | 676.5  | 128.7  | 634.3  | 106.1  |
| COL [°Pt-Co]                            | 6500   | 1017.3 | 8207.1 | 1115.9 |
| TSS [mg L <sup>-1</sup> ]               | 530.9  | 119.3  | 666.6  | 90.5   |
| pH [-]                                  | 7.2    | 0.2    | 7.3    | 0.2    |
| COD [mg L <sup>-1</sup> ]               | 5263.1 | 1693.6 | 4078.3 | 998.2  |
| N-NH <sub>3</sub> [mg L <sup>-1</sup> ] | 92.5   | 10.6   | 76.3   | 8.9    |
| N-NO <sub>x</sub> [mg L <sup>-1</sup> ] | 19.9   | 7      | 7.3    | 2.3    |

## References

24. PVK Prague Waterworks and Sewerage: Everything about Water/Drinking Water (in Czech) Available online: <https://www.pvk.cz/vse-o-vode/pitna-voda/> (accessed on 14 March 2023).
34. Alisawi, H.A.O. Performance of Wastewater Treatment during Variable Temperature. *Appl Water Sci* **2020**, *10*, 89, doi:10.1007/s13201-020-1171-x.
